# Supplementary material
Source: PubMed Central journal article supplement (PMC4722288)
Supplement: NIHMS66700-supplement-Supp_Table.pdf [file NIHMS66700-supplement-Supp_Table.pdf]

## Supplementary Table

| Gene     | Mutation  | Chr | Position<br>(GRCh37) | ref | alt | 1000 Genomes |        |        |        | NHLBI Exomes |        | UK10K   |        | ODEX   | dbSNP       |
|----------|-----------|-----|----------------------|-----|-----|--------------|--------|--------|--------|--------------|--------|---------|--------|--------|-------------|
|          |           |     |                      |     |     | EUR          | AMR    | AFR    | ASN    | EA           | AA     | Cohorts | Exomes | Exomes | v137        |
| POC1A    | Q350Rfs*4 | 3   | 52130662             | G   | -   | a            | a      | a      | a      | a            | a      | a       | 0.0002 | a      | a           |
| CADPS    | R884S     | 3   | 62484893             | G   | T   | a            | a      | a      | a      | a            | a      | a       | 0.0002 | a      | a           |
| CACNA2D2 | I552V     | 3   | 50413592             | T   | C   | a            | a      | a      | a      | a            | a      | a       | 0.0002 | a      | a           |
| RSAD1    | D249H     | 17  | 48559722             | G   | C   | a            | a      | a      | a      | 0.0013       | 0.0005 | 0.0015  | 0.0009 | a      | rs137932823 |
| TMEM44   | Y94H      | 3   | 194346704            | A   | G   | 0.0026       | 0.0000 | 0.0000 | 0.0000 | 0.0020       | 0.0002 | 0.0013  | 0.0021 | 0.0012 | rs140271606 |
| TTN      | A9429G    | 2   | 179553857            | G   | C   | a            | a      | a      | a      | a            | a      | a       | 0.0002 | a      | a           |
| TTN      | L16074Q   | 2   | 179465706            | A   | T   | 0.0013       | 0.0000 | 0.0000 | 0.0000 | 0.0007       | 0.0002 | 0.0005  | 0.0005 | a      | rs140714512 |

**Supplementary Table 1. Rare homozygous variants found in the proband.** Chromosome positions are relative to NCBI build 37. Ref refers to the NCBI reference sequence allele, alt refers to the alternate allele. Non-reference allele frequencies are given for a) 1000 Genomes (release 2012-07-19) - EUR (European ancestry), AMR (from the Americas), AFR (West African ancestry), ASI (East Asian ancestry); b) NHLBI Exome Variant Server (release ESP6500SI-V2, Apr-2013) – EA (European American ancestry), AA (African American ancestry); c) 3,781 Genomes from the UK10K Cohorts group (UK10K Cohorts, release 2012-06-02) - all of European ancestry d) 5,233 Exomes from the UK10K Exomes group (UK10K Exomes, release 2013-04-20) and e) 409 CoLaus Exomes (ODEX, release Dec-2010) - all of European ancestry. Variants absent from the control populations are labelled "a". TMEM44 is an integral membrane component with ubiquitous expression. CADPS encodes a calcium binding protein involved in exocytosis, vesicle organisation and catecholamine secretion. CACNA2D2 is a subunit of voltage-dependent calcium channels, regulating calcium current density and channel activation/ inactivation kinetics. Targeted disruption in mice causes growth retardation, decreased lifespan, ataxia, seizures and cardiac anomalies (Ivanov et al, Am J Pathol. 2004 Sep;165(3):1007-18), while a homozygous frameshift mutation has been associated with cerebellar ataxia and epilepsy in humans (Pippucci *et al*, PLoS One. 2013 Dec 16;8(12):e82154). RSAD1 has been proposed to play a role in porphyrin cofactor biosynthesis and a mouse knock out showed no relevant phenotype (IMPC). TTN is a large, highly polymorphic gene playing a key role in muscle assembly and contraction.
