# Supplementary material
Source: PubMed Central journal article supplement (PMC4722288)

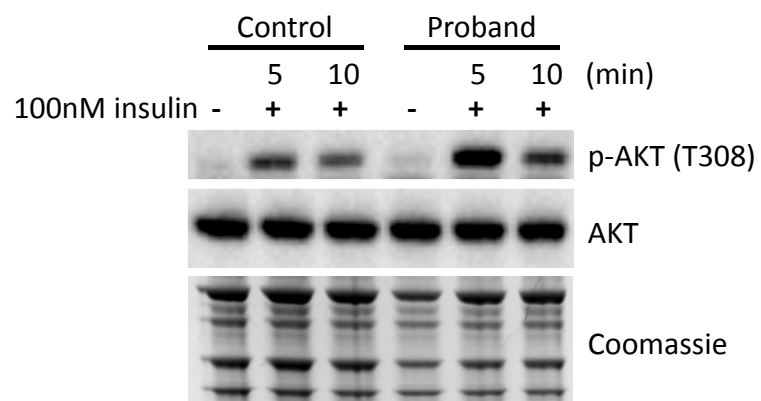

Supplementary Figure 1

Supplement: NIHMS66700-supplement-Supp_Fig_1.pdf [file NIHMS66700-supplement-Supp_Fig_1.pdf]

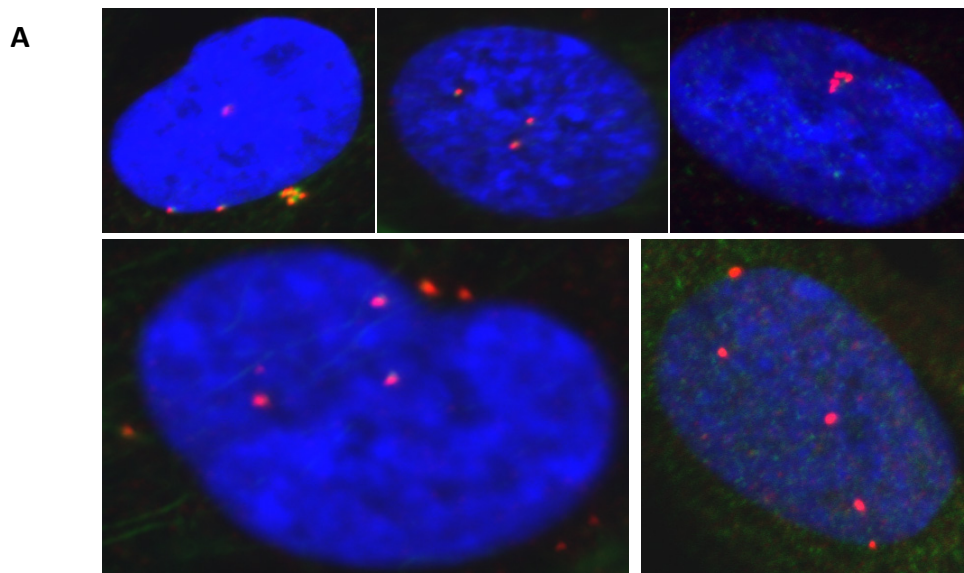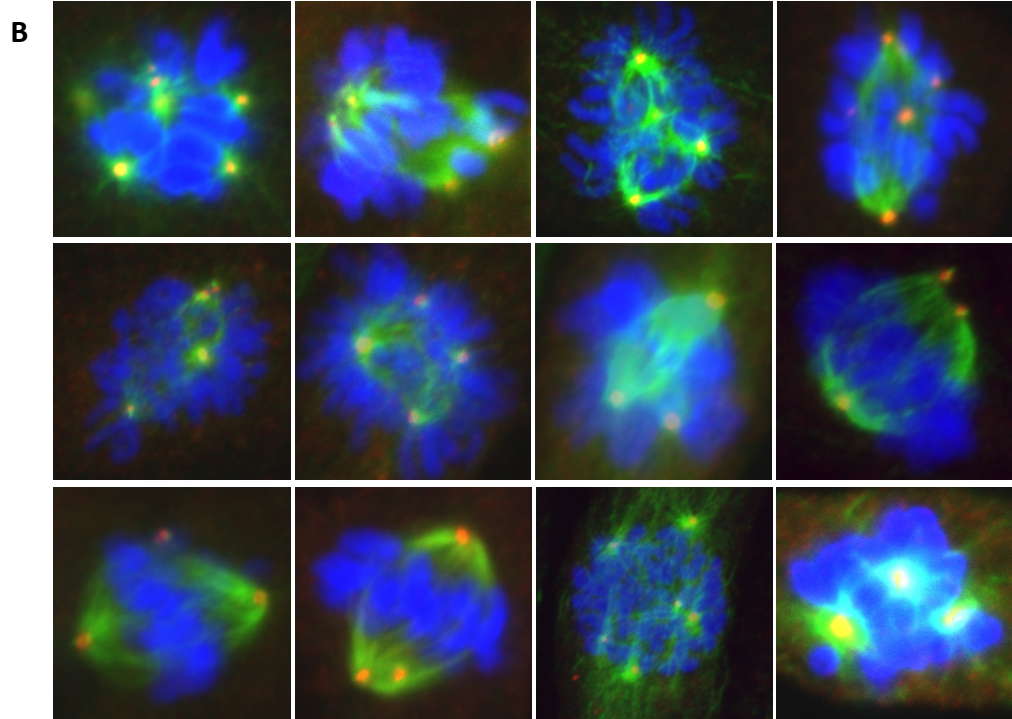

Supplementary Figure 2

Supplement: NIHMS66700-supplement-Supp_Fig_2.pdf [file NIHMS66700-supplement-Supp_Fig_2.pdf]

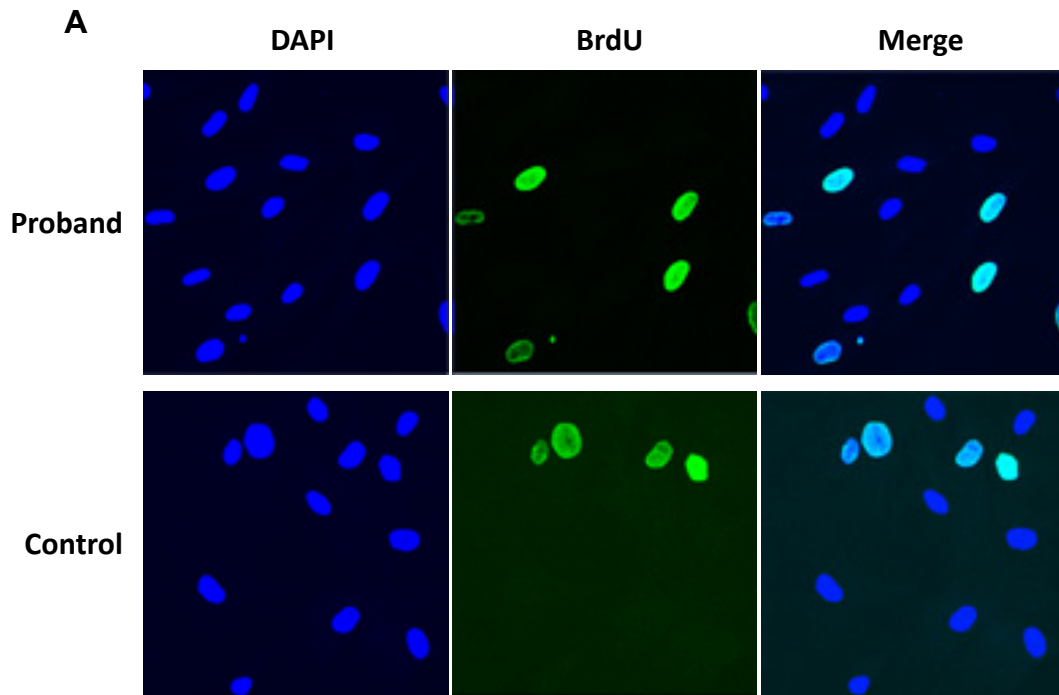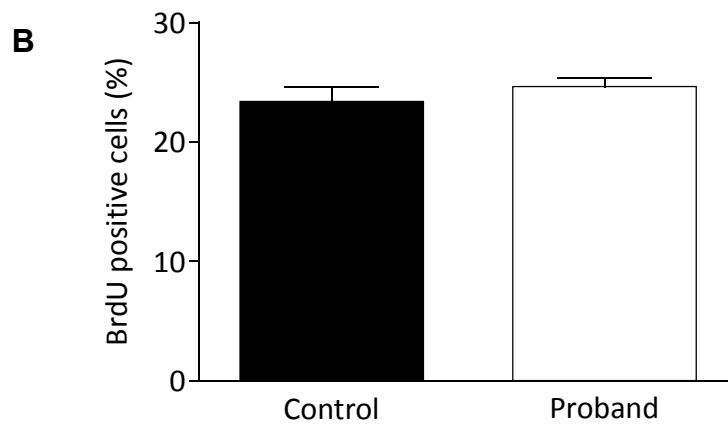

Supplementary Figure 3

Supplement: NIHMS66700-supplement-Supp_Fig_3.pdf [file NIHMS66700-supplement-Supp_Fig_3.pdf]

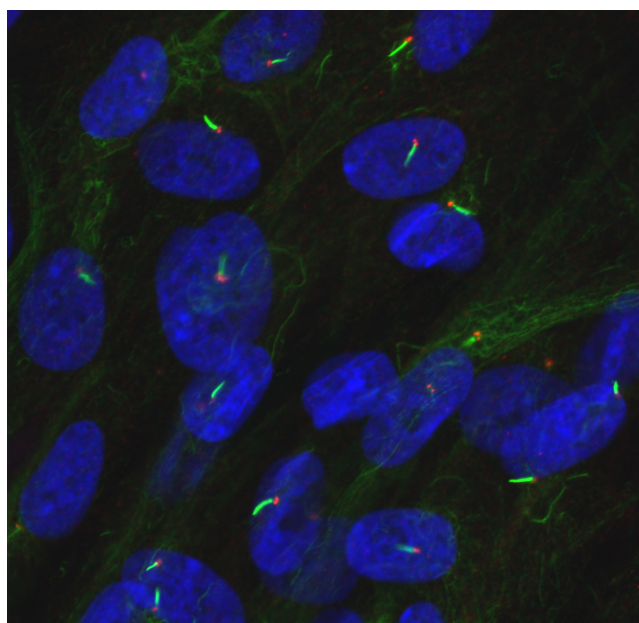

**Supplementary Figure 4**

Supplement: NIHMS66700-supplement-Supp_Fig_4.pdf [file NIHMS66700-supplement-Supp_Fig_4.pdf]

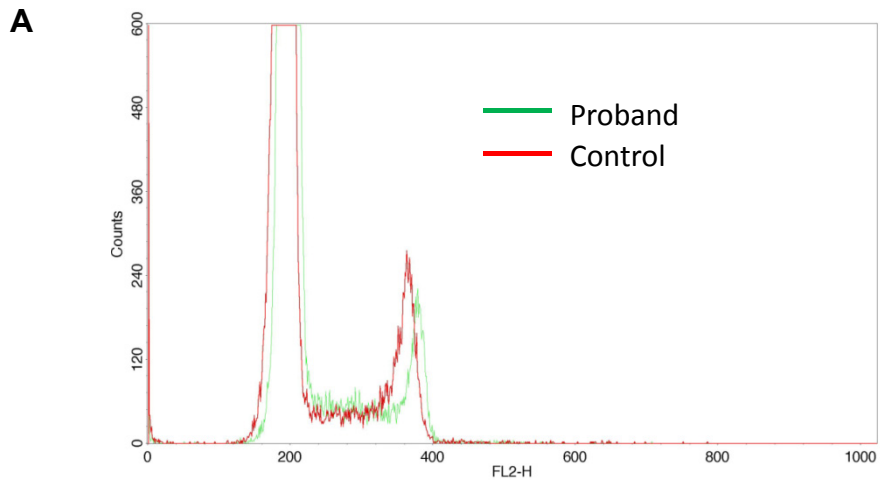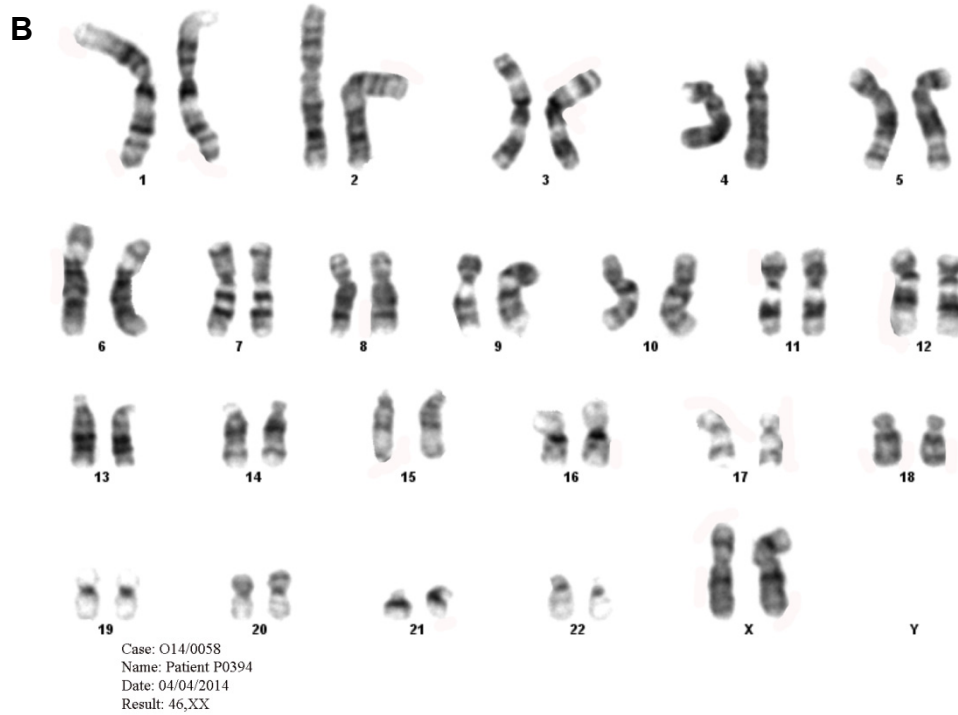

Supplementary Figure 5

Supplement: NIHMS66700-supplement-Supp_Fig_5.pdf [file NIHMS66700-supplement-Supp_Fig_5.pdf]

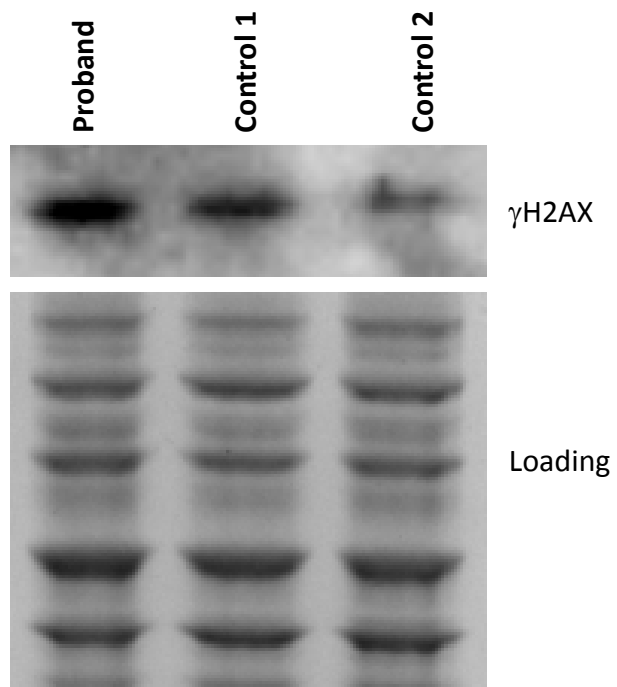

**Supplementary Figure 6**

Supplement: NIHMS66700-supplement-Supp_Fig_6.pdf [file NIHMS66700-supplement-Supp_Fig_6.pdf]
